1 **Title:** Unsupervised Machine learning to subtype Sepsis-Associated Acute Kidney Injury

2

3 Kumardeep Chaudhary, PhD<sup>2\*</sup>, Aine Duffy, MS<sup>2\*</sup>, Priti Poojary, MD<sup>1</sup>, Aparna Saha, MD<sup>2</sup>, Kinsuk

4 Chauhan, MD<sup>1</sup>, Ron Do, PhD<sup>2</sup>, Tielman Van Vleck, PhD<sup>2</sup>, Steven G. Coca, DO<sup>1</sup>, Lili Chan, MD<sup>1</sup>,

5 Girish N. Nadkarni, MD<sup>1,2</sup>

6

7 <sup>1</sup>Division of Nephrology, Department of Medicine, Icahn School of Medicine at Mount Sinai, New

8 York, NY

9 <sup>2</sup>Department of Genetics and Genomic Sciences, Icahn School of Medicine at Mount Sinai, New

10 York, NY

11

12 \*KC and AD contributed equally. LC and GNN contributed equally.

13 Running Headline: AKI Subtypes in Sepsis

14 **Corresponding author:**

15 Girish N. Nadkarni, MD, MPH

16 Icahn School of Medicine at Mount Sinai,

17 One Gustave L Levy Place, Box 1243

18 New York, NY-10029

19 Telephone number: (212) 241-1385

20 Fax number: (212) 849-2643

21 Email Address: [girish.nadkarni@mountsinai.org](mailto:girish.nadkarni@mountsinai.org)

22

23 Funding/Support: L.C. is supported in part by the NIH (5T32DK007757 – 18); GNN is supported

24 in part by the NIH (1K23DK107908-01A1)

25 Keywords: AKI, machine learning, sepsis, subtypes, MIMIC

26

27 **Abstract:**

28 **Objective:** Acute kidney injury (AKI) is highly prevalent in critically ill patients with sepsis.

29 Sepsis-associated AKI is a heterogeneous clinical entity, and, like many complex syndromes, is  
30 composed of distinct subtypes. We aimed to agnostically identify AKI subphenotypes using  
31 machine learning techniques and routinely collected data in electronic health records (EHRs).

32 **Design:** Cohort study utilizing the MIMIC-III Database.

33 **Setting:** ICUs from tertiary care hospital in the U.S.

34 **Patients:** Patients older than 18 years with sepsis and who developed AKI within 48 hours of  
35 ICU admission.

36 **Interventions:** Unsupervised machine learning utilizing all available vital signs and laboratory  
37 measurements.

38 **Measurements and Main Results:** We identified 1,865 patients with sepsis-associated AKI.  
39 Ten vital signs and 691 unique laboratory results were identified. After data processing and  
40 feature selection, 59 features, of which 28 were measures of intra-patient variability, remained  
41 for inclusion into an unsupervised machine-learning algorithm. We utilized k-means clustering  
42 with k ranging from 2 – 10; k=2 had the highest silhouette score (0.62). Cluster 1 had 1,358  
43 patients while Cluster 2 had 507 patients. There were no significant differences between  
44 clusters on age, race or gender. We found significant differences in comorbidities and small but  
45 significant differences in several laboratory variables (hematocrit, bicarbonate, albumin) and  
46 vital signs (systolic blood pressure and heart rate). In-hospital mortality was higher in cluster 2  
47 patients, 25% vs. 20%, p=0.008. Features with the largest differences between clusters

48 included variability in basophil and eosinophil counts, alanine aminotransferase levels and  
49 creatine kinase values.

50 **Conclusions:** Utilizing routinely collected laboratory variables and vital signs in the EHR, we  
51 were able to identify two distinct subphenotypes of sepsis-associated AKI with different  
52 outcomes. Variability in laboratory variables, as opposed to their actual value, was more  
53 important for determination of subphenotypes. Our findings show the potential utility of  
54 unsupervised machine learning to better subtype AKI.

55

56 **Introduction:**

57 Acute kidney injury (AKI) occurs in up to a quarter of hospitalized patients and has been  
58 repeatedly shown to be associated with increased morbidity and mortality.(1–4) Sepsis is the  
59 most common cause of AKI in critically ill patients admitted to the intensive care units (ICU). It  
60 was initially thought that sepsis-associated AKI is due to systemic hypotension leading to a  
61 decrease in renal perfusion resulting in renal ischemia and acute tubular necrosis (ATN).  
62 However, there is growing evidence of different mechanisms of sepsis-associated AKI with  
63 potentially different clinical characteristics and outcomes.(5)

64 Thus, AKI is not likely a single clinical entity, but likely a clinical syndrome comprised of  
65 several different subtypes. However, there has not been any investigation into identifying these  
66 subphenotypes, which are all labeled sepsis-associated AKI. Electronic health records (EHRs)  
67 especially in the ICU setting, collect thousands of data points per individual patient. While there  
68 have been previous studies showing that machine learning approaches using EHR data identify  
69 distinct subtypes in chronic disease, there have not been any studies in acute disease.(6)

70 Our primary aim was to determine if we could identify subphenotypes of sepsis-  
71 associated AKI utilizing measurements done as part of patients' routine care outside of  
72 traditional features such as age, gender, race, and comorbidities. We sought to incorporate  
73 hundreds of data features collected routinely in the EHR using unsupervised machine learning  
74 to identify subphenotypes of AKI in patients admitted to the intensive care unit with sepsis and  
75 explore differences in patient outcomes between the clusters.

76

77 **Methods:**

78 *Study Population:*

79 We utilized the Medical Information Mart for Intensive Care (MIMIC-III) database to  
80 identify patients with sepsis-induced AKI. MIMIC-III is a freely accessible critical care database  
81 of patients from a large, single center tertiary care hospital (Beth Israel Deaconess Medical  
82 Center in Boston, Massachusetts) from 2001 to 2012.(7) This database includes patient  
83 demographics, vital signs, laboratory results, billing codes, and notes. We included patients in  
84 the analyses if they had AKI within 48 hours of ICU admission as per Kidney Disease: Improving  
85 Global Outcomes (KDIGO) Guidelines.(8) We then defined sepsis with the Clinical Classification  
86 Software (CCS) which groups discharges into mutually exclusive categories utilizing  
87 International Classification of Diagnosis – Ninth Revision Codes (ICD-9).(9) We defined patient  
88 co-morbidities using the Elixhauser Comorbidity Software, which identifies comorbidities by  
89 grouping ICD-9-CM codes from hospital discharge records.(10) We excluded patients if they  
90 were less than 18 years old, admitted for  $\leq 24$  hours, end stage renal disease (ESRD), or  
91 missing vital signs. A study flow diagram is included in **Supplemental Figure S1**. As patients  
92 could be admitted several times during the 11 year period and develop AKI, we considered only  
93 the data from the first admission with AKI per person.

94 *Data Processing:*

95 We utilized laboratory values and vital sign measurements to identify the clusters and  
96 considered all labs and vitals from admission to 48 hours after the diagnosis of AKI for inclusion.  
97 We excluded data features which were missing in  $> 70\%$  of patients. As there are fundamental  
98 differences in the measurements of the laboratory tests and vital signs features, they were  
99 processed separately. For vital signs, we had a feature space of 30 (including median, SD and  
100 count). The laboratory results feature space was much larger with 691 unique features with at  
101 least one value. We removed the median features with  $>70\%$  missing values; corresponding SD

102 and count were added later to the remaining lab features. For both class of features, we used k-  
103 nearest neighbor (knn)-based imputation method using 2 neighbors. *impute.knn* function was  
104 used in the *impute* R package.(11)

105         Since the laboratory results and vital signs have a different range of values, we used  
106 YeoJohnson (YJ) normalization separately to normalize the feature space.(12) For each class,  
107 features that were highly correlated (correlation coefficient >0.50) were excluded. The absolute  
108 values of pair-wise correlations were considered. If two variables have a high correlation, the  
109 function looks at the mean absolute correlation of each variable and removes the variable with  
110 the largest mean absolute correlation. This step was done to remove redundant features that  
111 added no additional information to the downstream clustering method. Subsequently, the  
112 features from labs and vitals were combined together and subjected to Box-Cox normalization  
113 to bring all features to a comparable scale.(12) Finally, the data were translated and  
114 transformed at log scale just prior to actual k-means clustering. Throughout the data processing  
115 steps, laboratory features derived from albumin, bicarbonate, and potassium were kept as we  
116 clinically adjudicated them to be meaningful.(13, 14) Selected features contributed to the final  
117 unsupervised clustering.

118

119 *Clustering:*

120         With the final feature matrix of combined labs and vitals for all the samples, we  
121 performed unsupervised clustering using k-means. We opted to generate 25 initial  
122 configurations for a range of cluster numbers (k=2 to k=10). We calculated the silhouette score  
123 in order to select the best cluster (k). Apart from that, we performed a 10-fold cross-validation  
124 using the features among the clusters corresponding to the final selected k. We used the  
125 random forest algorithm implemented in the *caret* package. We opted for 5 variables to be  
126 randomly sampled as candidates at each split and used 5 trees to grow in the 10-fold cross  
127 validation. Further, we picked each of the features and measured the difference in means

128 between the two clusters. This was done to see the feature importance in each cluster with  
129 respect to each other. After obtaining the cluster labels, we used t-Distributed Stochastic  
130 Neighbor Embedding (tSNE) technique to reduce data to three dimensions for better  
131 visualization. We used the default parameters in the *Rtsne* package with perplexity=40.(15)  
132 Finally, clusters were visualized in 3D space using the *scatterplot3d* package in R.(16)

### 133 *Statistical Analysis:*

134 After cluster identification, we conducted analysis to explore differences between  
135 clusters. We used t-test for continuous variables, and Fisher's exact test or chi-Square for  
136 categorical variables. We included need for renal replacement therapy, mechanical ventilation,  
137 and in-hospital mortality as outcomes of interest. We used log binomial regression to determine  
138 the association between cluster and adverse outcomes while accounting for patient  
139 characteristics that were significantly different on univariate analysis. We chose log binomial  
140 regression instead of logistic regression due to the high rates of in-hospital mortality. As this  
141 study was done on publically available, de-identified data, it was considered IRB exempt.  
142 Analysis was done using SAS 9.4 and R 3.4.3 software.

143

144

145 **Results:**

146 *Clinical Features of Patients with Sepsis-associated AKI:*

147 We identified 1,865 patients who had sepsis-associated AKI. Patients had a mean age  
148 of 66.3±15 years; 57% were men, and 75% were white. Most patients were admitted to the  
149 medical intensive care unit (MICU) (70%). Patients had a high prevalence of hypertension  
150 (51%), cardiac arrhythmias (38%), and diabetes mellitus (34%).

151 *Feature selection:*

152 Ten vital signs were available in the MIMIC-III database. Each vital sign was included as  
153 a median, SD, and count (number of times measured) for a total of 30 features. We identified  
154 691 unique features corresponding to laboratory results, the total feature space including  
155 median, SD, and count was 2,073. After implementing data preprocessing (see Methods), total  
156 feature space after combining these vitals and labs contained 135 features. The feature  
157 selection step further reduced the number of features to 59 (9 vitals and 50 labs). Missingness  
158 of the original features and final features are presented in **Supplemental Figure 2** and **3**  
159 respectively.

160 *Unsupervised Clustering to identify Subphenotypes:*

161 From these combined features with transformed values, we implemented the k-means  
162 clustering ranging from k=2 to k=10. We relied on silhouette score for the independent  
163 assessment and selection of the cluster selection. We found k=2 with maximum silhouette score  
164 of 0.62; which was highest among the other cluster runs (**Supplementary Figure 4**). Cluster 1  
165 had 1,358 patients while cluster 2 had 507 patients. (**Figure 1**) To assess robustness of  
166 clusters, we performed 10-fold cross-validation after we identified cluster labels. We obtained an  
167 average of 97.6% accuracy using the random forest algorithm.

168 *Clinical and Biological Characteristics of Each Phenotype:*

169 We identified several patient and admission characteristics that were significantly  
170 different between clusters. (**Supplemental Table 1**) Cluster 1 patients had higher prevalence of



171 congestive heart failure (CHF) (37% vs. 31%,  $p=0.009$ ) and lower prevalence of diabetes  
172 mellitus (DM) (36% vs. 39%,  $p=0.01$ ). Mean Simplified Acute Physiology Score (SAPS) II scores  
173 were lower in Cluster 1,  $45\pm 15$  vs.  $47.6\pm 16$ ,  $p=0.002$ . Patients in cluster 1 were less likely to be  
174 admitted to the MICU (68% vs 76%,  $p=0.001$ ) and less likely to have urgent/emergency  
175 admissions (97% vs 99%,  $P=0.02$ ). There were statistically significant differences in several  
176 laboratory features such as hemoglobin, platelets, sodium, bicarbonate, and albumin however  
177 the absolute differences were relatively small. Cluster 1 had significantly higher systolic blood  
178 pressure (SBP), lower heart rate, and lower respiratory rate.

179 To determine the importance of each feature on clustering, we determined the mean  
180 difference between two clusters at the log scale (**Figure 2**). The largest differences were seen  
181 in basophil variability, eosinophil variability, creatine kinase and ALT variability. Features such  
182 as sodium, temperature, and pH level were not substantially different between clusters and  
183 likely had a smaller effect on cluster determination.

#### 184 *Association between Phenotype and Outcomes:*

185 There was no difference in dialysis need between the two clusters (**Table 1**). However,  
186 Cluster 2 had lower proportion of patients requiring mechanical ventilation (49% vs. 54%,  
187  $P=0.03$ ) and higher rates of in-hospital mortality (25% vs. 20%,  $P=0.008$ ). 30-day mortality was  
188 also higher in Cluster 2, however this was not statistically significant (30% vs 26%,  $P=0.11$ ).  
189 Patients in Cluster 2 had a 40% higher risk of in-hospital mortality after adjustment for age,  
190 gender, ethnicity, CHF, DM, hematologic malignancy, and first ICU care unit with an adjusted  
191 odds ratio of 1.4, 95% CI 1.1-1.8.

192

193

194 **Discussion:**

195 We identified two distinct clusters of patients from patients within the larger syndrome of  
196 sepsis-associated AKI using unsupervised machine learning on routinely measured laboratory  
197 measurements and vital signs. Measures of variability were important to the identification of  
198 clusters. Clusters were significantly different in regards to comorbidities, laboratory  
199 measurements, and vital signs. We also found that these subphenotypes differed significantly in  
200 terms of mortality and mechanical ventilation.

201 There has been speculation that AKI in the ICU is not a single clinical entity but likely a  
202 complex syndrome comprising of several different subtypes.(17) Due to widespread use of  
203 EHRs, granular data are collected as part of routine clinical care on every ICU patient. These  
204 massive troves of data provide us with the opportunity to investigate this hypothesis in a data-  
205 driven manner. Subendophenotyping in chronic disease, such as diabetes has been conducted  
206 using similar EHR data with great success, and patient subgroups are found to have differing  
207 outcomes and genetic pathways.(6) Previous work, using trial data from an acute respiratory  
208 distress syndrome (ARDS) clinical trial has shown that there exist different subtypes with  
209 differing outcomes.(18) However, to the best of our knowledge this is the first instance of  
210 utilizing routinely collected EHR data from the ICU setting for subphenotyping of sepsis-  
211 associated AKI. Thus, this reinforces the concept, that even acute derangements may have  
212 distinct clinical types, an important implication for personalizing care to each individual.

213 We found that in-hospital mortality was 25% higher in patients in cluster 2. Cluster 2  
214 patients had similar demographics and co-morbidities as Cluster 1 patients which indicate the  
215 clustering was not driven by these features. Additionally although features included in most ICU  
216 prediction models for mortality were also included as features in our clustering model, they likely  
217 played a small role in clustering as differences between the clusters on these variables were

218 small.(19, 20) Of note, there was no difference in renal function parameters of KDIGO AKI  
219 stages, creatinine, or blood urea nitrogen (BUN) levels. Additionally, there was no difference in  
220 dialysis need or continuous renal replacement therapy (CRRT) need. This was surprising as  
221 there is abundant literature stating that severity of AKI, especially the need for dialysis, is  
222 associated with high morbidity and mortality.(21, 22) This may be partially explained by our time  
223 restriction of including labs only prior to AKI diagnosis and within 48 hours after AKI  
224 diagnosis.(23) These findings together highlight that individual features that are traditionally  
225 associated with differences in mortality in critically ill patients were not sufficient to identify the  
226 subphenotypes we have found here.

227         The purpose of this study was to agnostically identify subphenotypes within a larger  
228 clinical syndrome in a data driven manner. Thus, all laboratory features and vital signs were  
229 considered for potential inclusion into the analysis. The only limitations were to exclude features  
230 that were missing in >70% of patients (since they were unlikely to be informative) and highly  
231 correlated features. Additionally, we included measurements related to potassium, bicarbonate,  
232 and albumin into the model as these were considered clinically relevant features. We felt that it  
233 was not only important to include actual values but also the frequency and variability of  
234 continuous variables; and in fact 28 of the 59 features selected for inclusion were measures of  
235 variability and 9 of the 59 were counts. This is a significant advancement compared to previous  
236 models of clustering, where only summary measures of the predictors (mean/median) are used  
237 for either predictive modeling or clustering.

238         Through this inclusive data-driven approach, we included several features/factors that  
239 are not traditionally considered as related to ICU mortality into our clustering method including  
240 variability in key laboratory parameters. There is growing data that variability in values are  
241 important predictors of adverse events that should be considered in the clinical care of critically  
242 ill patients.(24–26) Eosinophil variability was among the factors with the largest difference

243 between clusters. It has been established that eosinopenia occurs during an acute infection.(27)  
244 Several studies have found that eosinopenia can be used as a marker of sepsis on admission to  
245 MICU and is a significant predictor of ICU 28-day all-cause mortality.(28, 29) However, no  
246 studies have evaluated eosinophil variability and the association with outcomes in AKI.  
247 Creatine kinase was also higher in cluster 2 patients, who had higher mortality. Creatine kinase  
248 elevations can be seen in rhabdomyolysis, acute myocardial infarctions, and strokes. The  
249 etiology of creatine kinase measurements in this cohort of patients is currently unclear.  
250 However, it has been documented that hospitalized patients with fevers, especially those with  
251 bacteremia have been found to have elevated creatine kinase.(30) Additionally, observational  
252 data suggests an association between creatine kinase elevations and adverse outcomes. (31,  
253 32) Thus, our data suggest, that creatine kinase may be an unexplored biomarker of risk in  
254 patients with septic AKI.

255         The results of our study should be considered in light of some limitations. We used the  
256 CCS category of septicemia to define our sepsis population; therefore we are unable to  
257 determine the timing of sepsis diagnosis and AKI diagnosis. However, this was mitigated by  
258 limiting AKI diagnosis to within 48 hours of ICU admissions and thus identifying patients with  
259 sepsis-associated AKI at the expense of a smaller sample size. We only included laboratory  
260 results and vital signs into our clustering algorithm. We decided not to include demographics  
261 and comorbidities, since we wanted to explore whether unbiased biochemical and biometric  
262 measurements could lead to viable clustering approaches. Indeed, the absolute difference in  
263 clusters on the basis of demographics and comorbidities was small and did not explain the  
264 difference in mortality. As to be expected, a majority of patients in both clusters was admitted to  
265 the MICU as their first ICU service. However, there was a notable difference between clusters  
266 on ICU first service, with more Cluster 2 patients being admitted to the MICU. There are  
267 inherent differences between patients admitted to different specialty units on admission

268 diagnoses, nosocomial infection rates, and mortality. (33–35) Unfortunately, we are unable to  
269 identify medical patients who were boarded in non-medical ICUs as this may have an impact on  
270 mortality. Finally, while the MIMIC-III database is a large, granular, ICU database; it is a single  
271 center database. Although, we did cross-fold validation to ensure the clusters were robust,  
272 external validation in ICU databases from different centers is needed.

273           In conclusion, we were able to identify two distinct subphenotypes of sepsis-associated  
274 AKI using multidimensional biochemical and biometric data. These subphenotypes had similar  
275 baseline demographics, comorbidities, and AKI severity; however Cluster 2 patients had worse  
276 in-hospital mortality. Several factors which are not classically associated with adverse outcomes  
277 in sepsis-induced AKI were important contributors to the identification of subphenotypes. This  
278 approach could serve as a first step to identify clinical subtypes within the septic AKI syndrome  
279 and when combined with other –omics data, could help identify dysregulated pathways which  
280 could be targeted for therapeutic intervention.

281

282 Acknowledgements: None

283

284

285 References:

- 286 1. Chertow GM, Levy EM, Hammermeister KE, et al.: Independent association between  
287 acute renal failure and mortality following cardiac surgery. *Am J Med* 1998; 104:343–348
- 288 2. de Mendonça A, Vincent JL, Suter PM, et al.: Acute renal failure in the ICU: risk factors  
289 and outcome evaluated by the SOFA score. [Internet]. *Intensive Care Med* 2000; 26:915–  
290 21[cited 2018 Apr 3] Available from: <http://www.ncbi.nlm.nih.gov/pubmed/10990106>
- 291 3. Chertow GM, Burdick E, Honour M, et al.: Acute kidney injury, mortality, length of stay,  
292 and costs in hospitalized patients. *J Am Soc Nephrol* 2005; 16:3365–3370
- 293 4. Mansuri U, Patel A, Shah H, et al.: Trends and outcomes of sepsis hospitalizations  
294 complicated by acute kidney injury requiring hemodialysis. *J Crit Care* 2017; 38
- 295 5. Prowle JR, Ishikawa K, May CN, et al.: Renal blood flow during acute renal failure in man.  
296 [Internet]. *Blood Purif* 2009; 28:216–25[cited 2018 Apr 3] Available from:  
297 <http://www.ncbi.nlm.nih.gov/pubmed/19648741>
- 298 6. Li L, Cheng W-Y, Glicksberg BS, et al.: Identification of type 2 diabetes subgroups  
299 through topological analysis of patient similarity. [Internet]. *Sci Transl Med* 2015;  
300 7:311ra174[cited 2018 May 21] Available from:  
301 <http://stm.sciencemag.org/lookup/doi/10.1126/scitranslmed.aaa9364>
- 302 7. Johnson AEW, Pollard TJ, Shen L, et al.: MIMIC-III, a freely accessible critical care  
303 database [Internet]. *Sci Data* 2016; 3:160035[cited 2018 Mar 7] Available from:  
304 <http://www.nature.com/articles/sdata201635>
- 305 8. Kellum J a, Lameire N, Aspelin P, et al.: KDIGO Clinical Practice Guideline for Acute  
306 Kidney Injury [Internet]. *Kidney Int Suppl* 2012; 2:1–138Available from:  
307 [http://www.pubmedcentral.nih.gov/articlerender.fcgi?artid=4089764&tool=pmcentrez&ren  
308 dertype=abstract%5Cnhttp://www.pubmedcentral.nih.gov/articlerender.fcgi?artid=408961](http://www.pubmedcentral.nih.gov/articlerender.fcgi?artid=4089764&tool=pmcentrez&rendertype=abstract%5Cnhttp://www.pubmedcentral.nih.gov/articlerender.fcgi?artid=408961)

- 309 9&tool=pmcentrez&rendertype=abstract%5Cnhttp://www.pubmedcentral.nih.gov/articlere  
310 nder.fcgi
- 311 9. HCUP CCS. Healthcare Cost and Utilization Project (HCUP). May 2016. Agency for  
312 Healthcare Research and Quality, Rockville, MD. [www.hcup-](http://www.hcup-us.ahrq.gov/toolssoftware/ccs/ccs.jsp)  
313 [us.ahrq.gov/toolssoftware/ccs/ccs.jsp](http://www.hcup-us.ahrq.gov/toolssoftware/ccs/ccs.jsp). Accessed October 3, 2016.
- 314 10. HCUP: Elixhauser Comorbidity Software, Version 3.7 [Internet]. [cited 2017 Jan 1]  
315 Available from: <https://www.hcup-us.ahrq.gov/toolssoftware/comorbidity/comorbidity.jsp>
- 316 11. Hastie T, Tibshirani R, Narasimhan B, Chu G (2018). impute: impute: Imputation for  
317 microarray data. R package version 1.54.0.
- 318 12. Kuhn M: Building Predictive Models in R Using the caret Package [Internet]. *J Stat Softw*  
319 2008; 28:1–26[cited 2018 May 10] Available from: <http://www.jstatsoft.org/v28/i05/>
- 320 13. Wiedermann CJ, Wiedermann W, Joannidis M: Hypoalbuminemia and acute kidney  
321 injury: a meta-analysis of observational clinical studies [Internet]. *Intensive Care Med*  
322 2010; 36:1657–1665[cited 2018 May 14] Available from:  
323 <http://link.springer.com/10.1007/s00134-010-1928-z>
- 324 14. Khanagavi J, Gupta T, Aronow WS, et al.: Hyperkalemia among hospitalized patients and  
325 association between duration of hyperkalemia and outcomes [Internet]. *Arch Med Sci*  
326 2014; 2:251–257[cited 2018 May 14] Available from:  
327 <http://www.ncbi.nlm.nih.gov/pubmed/24904657>
- 328 15. Krijthe JH: Rtsne: T-Distributed Stochastic Neighbor Embedding using a Barnes-Hut  
329 Implementation [Internet]. Available from: <https://github.com/jkrijthe/Rtsne>
- 330 16. Ligges U, Mächler M: Scatterplot3d - an R Package for Visualizing Multivariate Data. *J*  
331 *Stat Softw* 8:1–20
- 332 17. Singbartl K, Kellum JA: AKI in the ICU: definition, epidemiology, risk stratification, and



- 333 outcomes. [Internet]. *Kidney Int* 2012; 81:819–25[cited 2018 May 21] Available from:  
334 <http://linkinghub.elsevier.com/retrieve/pii/S008525381555401X>
- 335 18. Calfee CS, Delucchi K, Parsons PE, et al.: Subphenotypes in acute respiratory distress  
336 syndrome: latent class analysis of data from two randomised controlled trials [Internet].  
337 *Lancet Respir Med* 2014; 2:611–620[cited 2018 May 21] Available from:  
338 <http://www.ncbi.nlm.nih.gov/pubmed/24853585>
- 339 19. Le Gall J-R, Lemeshow S, Saulnier F: A New Simplified Acute Physiology Score (SAPS  
340 II) Based on a European/North American Multicenter Study [Internet]. *JAMA J Am Med*  
341 *Assoc* 1993; 270:2957[cited 2018 Apr 11] Available from:  
342 <http://jama.jamanetwork.com/article.aspx?doi=10.1001/jama.1993.03510240069035>
- 343 20. Knaus WA, Draper EA, Wagner DP, et al.: APACHE II: a severity of disease classification  
344 system. [Internet]. *Crit Care Med* 1985; 13:818–29[cited 2018 Apr 11] Available from:  
345 <http://www.ncbi.nlm.nih.gov/pubmed/3928249>
- 346 21. Huh JW, Lim C-M, Koh Y, et al.: A Comparison of Acute Kidney Injury Classifications in  
347 Patients With Severe Sepsis and Septic Shock [Internet]. *Am J Med Sci* 2012; 344:350–  
348 356[cited 2018 Apr 11] Available from: <http://www.ncbi.nlm.nih.gov/pubmed/22261626>
- 349 22. White LE, Hassoun HT, Bihorac A, et al.: Acute kidney injury is surprisingly common and  
350 a powerful predictor of mortality in surgical sepsis. [Internet]. *J Trauma Acute Care Surg*  
351 2013; 75:432–8[cited 2018 Apr 11] Available from:  
352 <http://www.ncbi.nlm.nih.gov/pubmed/24089113>
- 353 23. Kim WY, Huh JW, Lim C-M, et al.: Analysis of progression in risk, injury, failure, loss, and  
354 end-stage renal disease classification on outcome in patients with severe sepsis and  
355 septic shock [Internet]. *J Crit Care* 2012; 27:104.e1-104.e7[cited 2018 Apr 11] Available  
356 from: <http://www.ncbi.nlm.nih.gov/pubmed/21715135>

- 357 24. Hermanides J, Vriesendorp TM, Bosman RJ, et al.: Glucose variability is associated with  
358 intensive care unit mortality\* [Internet]. *Crit Care Med* 2010; 38:838–842[cited 2018 Apr  
359 12] Available from: <http://www.ncbi.nlm.nih.gov/pubmed/20035218>
- 360 25. Hessels L, Hoekstra M, Mijzen LJ, et al.: The relationship between serum potassium,  
361 potassium variability and in-hospital mortality in critically ill patients and a before-after  
362 analysis on the impact of computer-assisted potassium control [Internet]. *Crit Care* 2015;  
363 19:4[cited 2018 Apr 17] Available from: <http://www.ncbi.nlm.nih.gov/pubmed/25560457>
- 364 26. Brown SM, Tate Q, Jones JP, et al.: Initial fractal exponent of heart rate variability is  
365 associated with success of early resuscitation in patients with severe sepsis or septic  
366 shock: a prospective cohort study [Internet]. *J Crit Care* 2013; 28:959–963[cited 2018 Apr  
367 17] Available from: <http://www.ncbi.nlm.nih.gov/pubmed/23958243>
- 368 27. Bass DA, Gonwa TA, Szejda P, et al.: Eosinopenia of acute infection: Production of  
369 eosinopenia by chemotactic factors of acute inflammation. [Internet]. *J Clin Invest* 1980;  
370 65:1265–71[cited 2018 Apr 18] Available from:  
371 <http://www.ncbi.nlm.nih.gov/pubmed/7410543>
- 372 28. Abidi K, Belayachi J, Derras Y, et al.: Eosinopenia, an early marker of increased mortality  
373 in critically ill medical patients. [Internet]. *Intensive Care Med* 2011; 37:1136–42[cited  
374 2018 Apr 18] Available from: <http://link.springer.com/10.1007/s00134-011-2170-z>
- 375 29. Abidi K, Khoudri I, Belayachi J, et al.: Eosinopenia is a reliable marker of sepsis on  
376 admission to medical intensive care units. [Internet]. *Crit Care* 2008; 12:R59[cited 2018  
377 Apr 18] Available from: <http://www.ncbi.nlm.nih.gov/pubmed/18435836>
- 378 30. Cohen O, Leibovici L, Mor F, et al.: Significance of elevated levels of serum creatine  
379 phosphokinase in febrile diseases: a prospective study. [Internet]. *Rev Infect Dis* 13:237–  
380 42[cited 2018 Apr 25] Available from: <http://www.ncbi.nlm.nih.gov/pubmed/2041954>

- 381 31. Nieuwendijk R, Demey H, Jorens P: High incidence of elevated serum creatine kinase in  
382 the ICU: an underestimated problem [Internet]. *Crit Care* 2006; 10:P365[cited 2018 Apr  
383 11] Available from: <http://ccforum.biomedcentral.com/articles/10.1186/cc4712>
- 384 32. Sowards KJ, Mukherjee K, Norris PR, et al.: Elevated serum creatine phosphokinase is  
385 associated with mortality and inotropic requirement in critically injured adults [Internet].  
386 *Injury* 2014; 45:2096–2100[cited 2018 May 1] Available from:  
387 <http://www.ncbi.nlm.nih.gov/pubmed/25441175>
- 388 33. Ball IM, Bagshaw SM, Burns KEA, et al.: Outcomes of elderly critically ill medical and  
389 surgical patients: a multicentre cohort study [Internet]. *Can J Anesth Can d'anesthésie*  
390 2017; 64:260–269[cited 2018 Apr 13] Available from:  
391 <http://link.springer.com/10.1007/s12630-016-0798-4>
- 392 34. Craven DE, Kunches LM, Lichtenberg DA, et al.: Nosocomial infection and fatality in  
393 medical and surgical intensive care unit patients. [Internet]. *Arch Intern Med* 1988;  
394 148:1161–8[cited 2018 Apr 13] Available from:  
395 <http://www.ncbi.nlm.nih.gov/pubmed/3365084>
- 396 35. Sinha SS, Sjoding MW, Sukul D, et al.: Changes in Primary Noncardiac Diagnoses Over  
397 Time Among Elderly Cardiac Intensive Care Unit Patients in the United States [Internet].  
398 *Circ Cardiovasc Qual Outcomes* 2017; 10:e003616[cited 2018 Apr 13] Available from:  
399 <http://circoutcomes.ahajournals.org/lookup/doi/10.1161/CIRCOUTCOMES.117.003616>

400

401

402 Tables:

403 Table 1: Differences in outcomes by cluster

|                                         | <b>Cluster 1<br/>N=1358</b> | <b>Cluster 2<br/>N=507</b> | <b>P value</b> |
|-----------------------------------------|-----------------------------|----------------------------|----------------|
| <b>Outcomes</b>                         |                             |                            |                |
| Any Dialysis                            | 134 (10)                    | 45 (9)                     | 0.52           |
| CRRT                                    | 74 (6)                      | 29 (6)                     | 0.82           |
| CRRT duration (hours)                   | 126±115                     | 109±94                     | 0.5            |
| Mechanical Ventilation                  | 739 (54)                    | 248 (49)                   | 0.03           |
| Mechanical ventilation duration (hours) | 157±178                     | 172±173                    | 0.2            |
| In-hospital Mortality                   | 267 (20)                    | 129 (25)                   | 0.008          |
| 30-day Mortality                        | 354 (26)                    | 151 (30)                   | 0.11           |

404

405

406 Figures:

407 **Figure 1:** 3-D Representation of clusters utilizing t-Distributed Stochastic Neighbor Embedding  
408 (t-SNE) method. This method condenses the 59 features into 3 transformed values which allows  
409 for 3-D representation. Each dot represents a single patient. The separation between two dots  
410 represents differences of features between two patients. Cluster 1 is represented in blue while  
411 Cluster 2 is represented in green.

412 **Figure 2:** Mean Difference of Normalized Features between Cluster 1 and Cluster 2.

# AKI CLUSTERING (K=2)

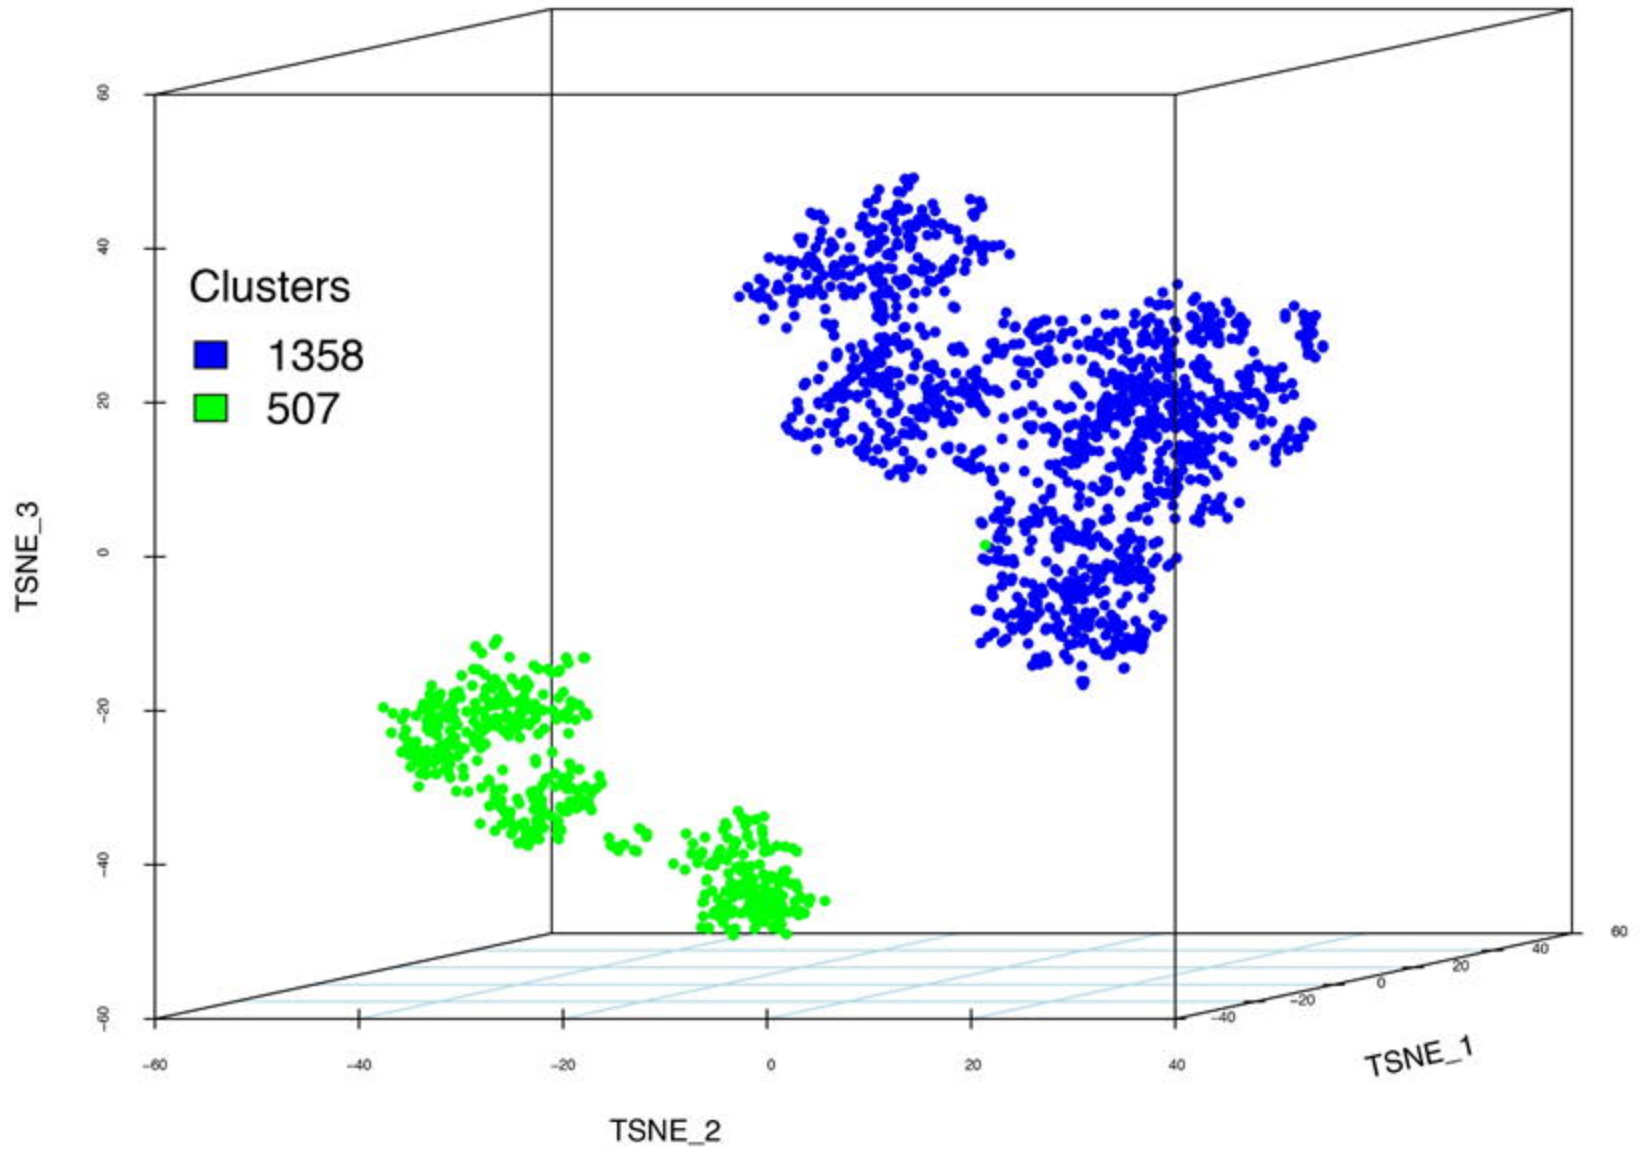

Feature Mean Difference (C1-C2)

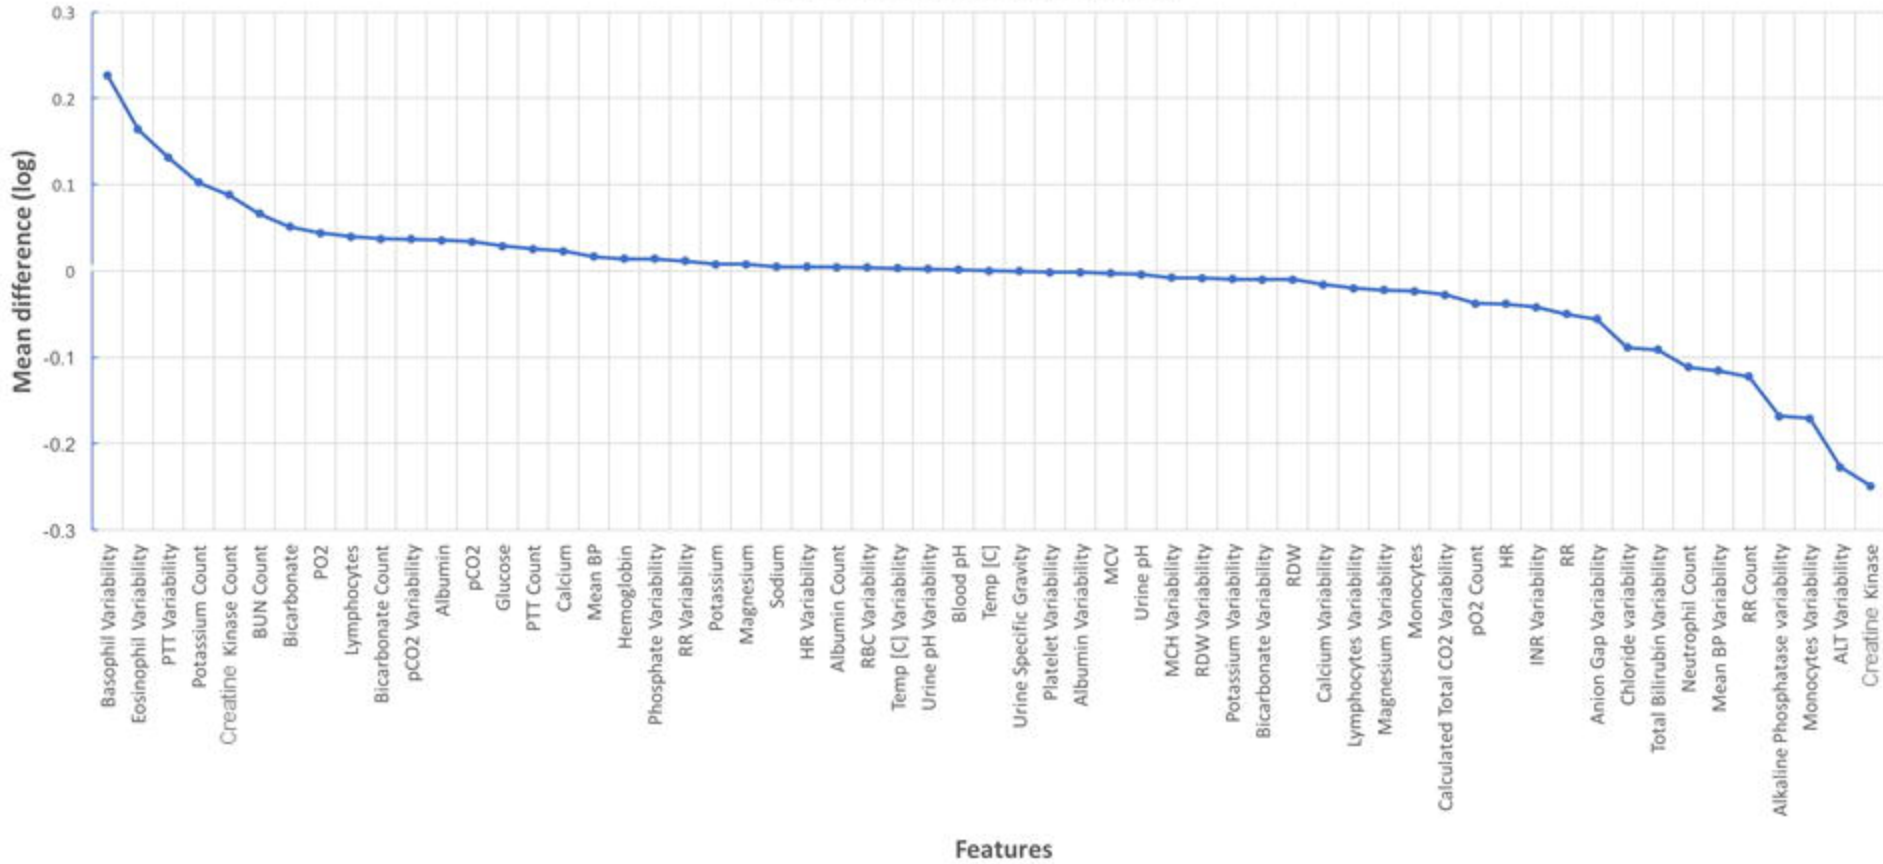

Source: https://www.biorxiv.org/content/10.1101/447425v1.full.pdf
